# Supplementary material for: Aptamer-modified sensitive nanobiosensors for the specific detection of antibiotics
Source: Royal Society of Chemistry journal article supplement (doi:10.1039/d0tb01441a), 2020-01-01
Supplement: d0tb01441a1.pdf [file d0tb01441a1.pdf]

ARTICLE

## Aptamer-modified Sensitive Nanobiosensors for Specific Detection of Antibiotics

### Supplementary Material

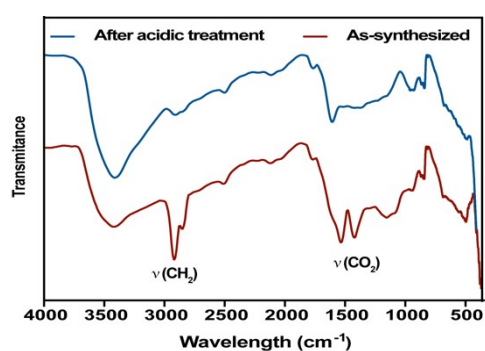

Figure S1 FTIR spectra of the CSUNPs before and after removal of oleate ligands.

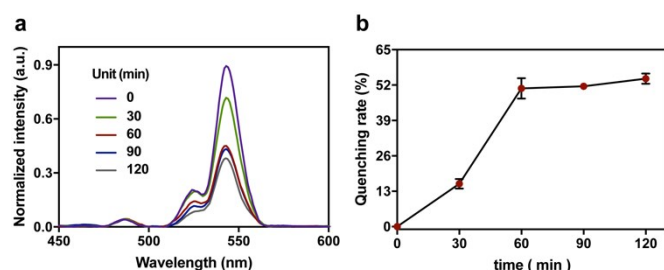

Figure S2 a) Changes in the emission spectra of aptamer-CSUNPs in the aqueous solution in the presence of GO (200  $\mu$ g/mL), showing an increase in interaction time leads to a decrease in emission intensity. b) Fluorescence quenching rate of aptamer-CSUNPs incubated with GO (200  $\mu$ g/mL) in different times. Data were presented as average  $\pm$  SD from three independent measurements.
